# Supplementary material
Source: HighWire-hosted journal article supplement (https://erj.ersjournals.com/highwire/filestream/121443/field_highwire_adjunct_files/0/ERJ-50579-2014.pdf)
Supplement: ERJ-50579-2014.pdf [file ERJ-50579-2014.pdf]

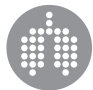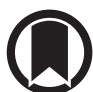

CrossMark

**“Pulmonary arterial hypertension in patients treated with interferon.”**

**Laurent Savale, Caroline Sattler, Sven Günther, David Montani, Marie-Camille Chaumais, Swanny Perrin, Xavier Jaïs, Andrei Seferian, Roland Jovan, Sophie Bulifon, Florence Parent, Gérald Simonneau, Marc Humbert and Olivier Sitbon.**  
*Eur Respir J* 2014; 44: 1627–1634.

Unfortunately, a typographical error in the above article meant that the number of cases of pulmonary arterial hypertension in patients previously treated with interferon- $\beta$  was overestimated; only two cases had been previously reported before the five cases included in the manuscript, not 10 as originally stated. Likewise, 10 cases of pulmonary arterial hypertension associated with use of interferon- $\alpha$  had been previously published, not two.

The following sentence from the third paragraph of the discussion section:

“Overall, two cases were attributed to IFN- $\alpha$  and 10 to IFN- $\beta$ .”

Has now been corrected in the online version of the article, and now reads:

“Overall, 10 cases were attributed to IFN- $\alpha$  and two to IFN- $\beta$ .”

*Eur Respir J* 2015; 46: 1 | DOI: 10.1183/09031936.50057914
